# Supplementary material for: The landscape of RNA polymerase II transcription initiation in C. elegans reveals promoter and enhancer architectures
Source: HighWire-hosted journal article supplement (doi:10.1101/gr.153668.112), 2013-04-02
Supplement: SuppLegends.docx [file SuppLegends.docx]

**Legends for supplements**

Supplemental Fig. S1. Examples of initiation and elongation patterns at trans-spliced genes. (A) Initiation sites are shown by nuclear short capRNA and elongation by nuclear long cap RNA coverage (green). Intron and outron coverage is not observed in whole cell poly(A)+ (mainly cytoplasmic) RNA track (gray).

Supplemental Fig. S2. Chromatin features of protein coding, ncRNA and unassigned TSS assignment classes. Enrichment signals of the indicated datasets was visualized by heat map for TIC modes of protein coding TSSs (n=5,206), ncRNA TSSs (n=1,726) and unassigned TSSs (n=22,241). Each dataset was ranked by H3K4me3/H3K4me1 ratio. The majority of protein coding TSSs (64%) has higher H3K4me3 than H3K4me1 whereas unassigned and ncRNA TSSs have the opposite pattern: 57% of unassigned and 64% of ncRNA TSSs have higher H3K4me1 than H3K4me3. The indicated signals are plotted in 2kb windows centered at TIC modes from only forward strand TSSs.

Supplemental Fig. S3. Comparison of capRNA TSSs to Wormbase transcript start sites. Genes in the top 40% expression band and having an assigned capRNA TSS were used. The distribution of embryo HTZ-1, H3, and mononucleosome signal was plotted centered either at short cap RNA TSSs (blue) or Wormbase transcript start sites (green) for the same set of genes.

Supplemental Fig. S4. Transcription initiation clusters (TICs) display a range of shapes. Plots display the distribution of short capRNA tags in 100 bp windows centered at the TIC mode (X-axis). Tags counts are shown on the Y-axis. Shape scores are calculated as the ratio of the number of tags at the mode TSS relative to the total number TSSs in the cluster (mode weight). Examples of shapes in each 0.1 score bin are shown, with the percentage and number of TICs in each shape bin shown at the right.

Supplemental Fig. S5. Bidirectional transcription at divergent and tandemly oriented protein coding genes. The density of forward (red) and reverse (blue) strand TSSs was plotted in a 1kb window centered at the mode TSSs of protein coding TICs.

Supplemental Fig. S6. Validated embryonic enhancer regions contain enhancers identified by overlap between TF-binding sites and TICs. (A) Enhancer regions identified in *lin-26/lir-1* region(Landmann et al. 2004) and (B) *hlh-1* (Lei et al. 2009) contain TF-binding sites that overlap TICs and that show an enhancer-like chromatin signature of high H3K4me1/low H3K4me3.

Supplemental Fig. S7. Sequence and chromatin features of enhancer TSSs (A) WebLogo analysis of sequence aligned at mode TSSs of enhancer TICs. (B) Inr, TATA, and Sp1 motif occurrence at sharp and broad enhancer TSSs. (C) Comparison of H2A variant HTZ-1/H2A.Z, histone H3, and embryo mononucleosomes at protein coding and enhancer TSSs.

Supplemental Table S1. Summary of Transcription Initiation Cluster (TIC) assignments

Supplemental Table S2. List of Transcription Initiation Clusters (TICs)

Supplemental Table S3. List of enhancers

Supplemental Table S4. GO-term analysis of genes associated with enhancers. Enhancers were assigned to the nearest downstream genes. Genes were analysed for enrichment or underenrichment of GO terms using GOstat (significance p<0.01) (Beissbarth and Speed 2004) (<http://gostat.wehi.edu.au/>). These GO lists were reduced based on functional redundancies by REVIGO (Supek et al. 2011) (http://revigo.irb.hr/).
